# Supplementary material for: Beringian Standstill and Spread of Native American Founders
Source: PLoS One. 2007 Sep 5;2(9):e829. doi: 10.1371/journal.pone.0000829 (PMC1952074; doi:10.1371/journal.pone.0000829)
Supplement: Table S2 — Haplogroup frequencies. (0.02 MB XLS) [file pone.0000829.s004.xls]

## Sheet: Sheet1
Table S2a. Haplogroup frequencies in Native American populations
Population	N	Hg A	A2*	A2a*	Hg B	B2*	Hg C	C1b*	C1c*	C1d*	C4c*	Hg D	D1*	D4h3*
Apache	20	8	8	8	5	5	7	5	2
Arsario	47	30	30				17		17
Cofanˇ	4				1	1	3		1	2
Catamarca	25	6	6		1	1	6	4		2		12	12
Cayapa	32	8	8		8	8	8	8				8		8
Coreguaje	27	1	1		5	5	18	6	1	11		3	3
Dogrib	23	23	23	6
Embera	39	9	9		21	21	9		2	7
Ijka	29	26	26		1	1	2				2
Kuna	34	21	21		13	13
Kogui	48	27	27				21	1	20
Mocovi	5	4	4									1	1
Ngöbe	77	49	49		28	28
Northern Paiute	20	2	2	2	8	8	3	3				7	7
Salta	18	4	4		7	7	5	5				2	1	1
Secoya	2	1	1		2	2	7	6		1
Siona	10				1	1	1	1
Zuni	11	2	2	1	7	7	2
Tucuman	9	3	3		1	1	5	3	1	1
Vaupes	22	5	5		3	3	8	6		2		6	6
Waunana	57	18	18		21	21	15		2	13		3	3
Wayuu	42	16	16		11	11	15	15
Total	601
ˇpooled with Secoya-Siona in analysis
Table S2b. Haplogroup frequencies in Asian populations
Population	N	Hg A	A2*	Hg C	C1a*	Hg D	D2a*	D2b*	D4h*
Eskimos	51	41	41			7	5
Chuckchi	155	59	55	22		30	8
Selkups	120	9	2	26		4
Kets	66	4		7		2
Tundra Nenets	70	1		34		4
Tuvas	202	8		77		36
Tuva Kizal	73	1		41		12
Khakas	185	7		40		12
Altai	208	3		60	2	25
Altai	131	5		21		23
Shors	170			66		17
Koryaks	71			15		2
Nanais	85	3		8		22
Uyghur	122	2		12		16
Kazakhs	406	18		31		83		1	1
Gilyaks (Nivkh)	58					2
Oroks	61			7	7	42
Kirghiz	105	11		16		19
Uzbeks	48			8		4
Tajiki	38	1		1		1
Buriats	201	9		53		47		2
Evenks (Chita)	94	9	2	35		32		1
Evenks (Sakha)	125	5		59		35		3
Evenks (West-Central)	105	17		62		22
Evens	105			48		26		1
Yukaghirs	22
Yakuts	423	8		175		125		3
Dolgans (Sakha)	27	2		14		5		1
Dolgans (Taymyr)	130	5		47		57		1
Nganasans	107	5		37		37
Total	3764
Hg indicates total nr of individuals belonging to hg, * denotes the nr of individuals belonging to a specific sub-clade inside the haplogroup.
